# Supplementary material for: Variations in Structure among Androecia and Floral Nectaries in the Inverted Repeat-Lacking Clade (Leguminosae: Papilionoideae)
Source: MDPI journal article supplement (doi:10.3390/plants11050649), 2022-02-27
Supplement: s1 [file s1]

**SUPPLEMENT 2. LIGHT MICROSCOPY IMAGES OF ANDROECIUM IN *GALEGA OFFICINALIS***

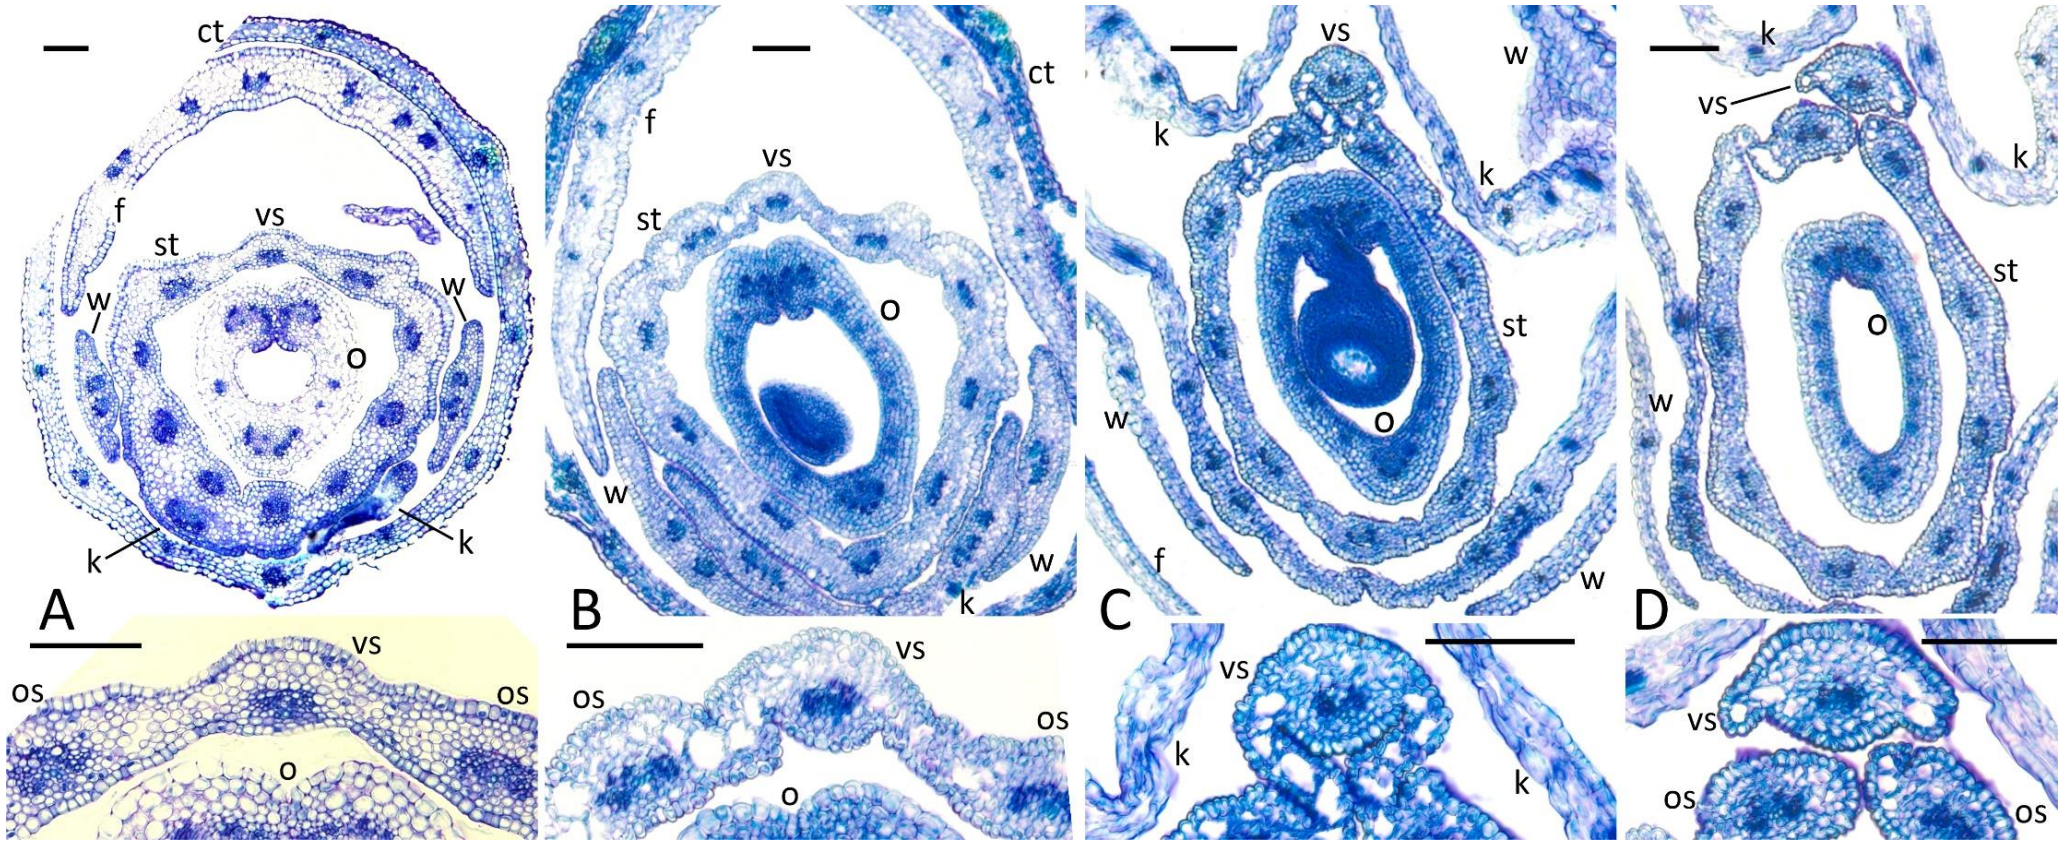

Androecium fusion in *Galega officinalis* as seen in a series of transverse sections of preanthetic flower on different levels (A is the closest to receptacle, while D is the most distal position), light microscopy. On each level, upper image represents overall topography, while lower is a magnification of the vexillary stamen. All images are oriented with their adaxial sides upwards. Key: ct = calyx tube; f = flag; k = keel; o = ovary; os = outer adaxial stamen (as traced by its vascular bundle); s = sepal; st = staminal tube; vs = vexillary stamen (D) or its bundle (A–C); w = wing. Scale bars: 100  $\mu\text{m}$ .
