# Supplementary material for: Variations in Structure among Androecia and Floral Nectaries in the Inverted Repeat-Lacking Clade (Leguminosae: Papilionoideae)
Source: MDPI journal article supplement (doi:10.3390/plants11050649), 2022-02-27
Supplement: s1 [file s1]

**SUPPLEMENT 3. STOMATA ON STAMINAL CONNECTIVES IN SELECTED REPRESENTATIVES OF THE IRLC**

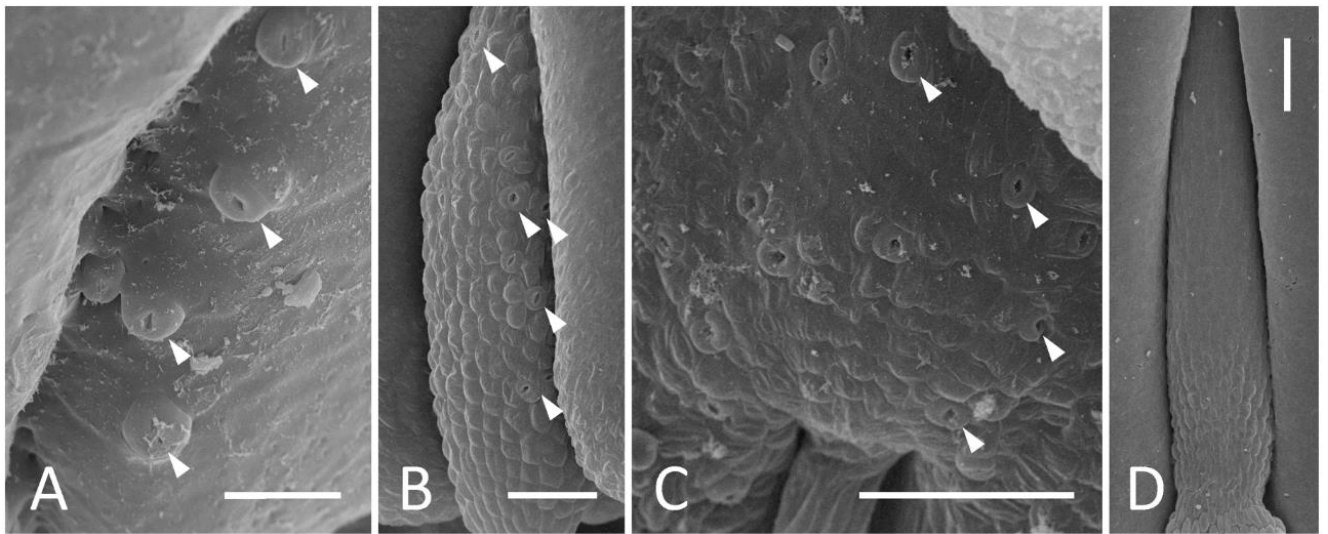

External surfaces of connectives in stamens of selected species. A, *Galega officinalis*; B, *Vicia sepium*; C, *Oxytropis kamtschatica*; D, *Ononis spinosa*. Arrowheads = exemplary stomata. Scale bars: 30  $\mu\text{m}$  (A), 100  $\mu\text{m}$  (B, C, D).
